# Supplementary material
Source: Research Square preprint supplement (doi:10.21203/rs.3.rs-8901365/v1)

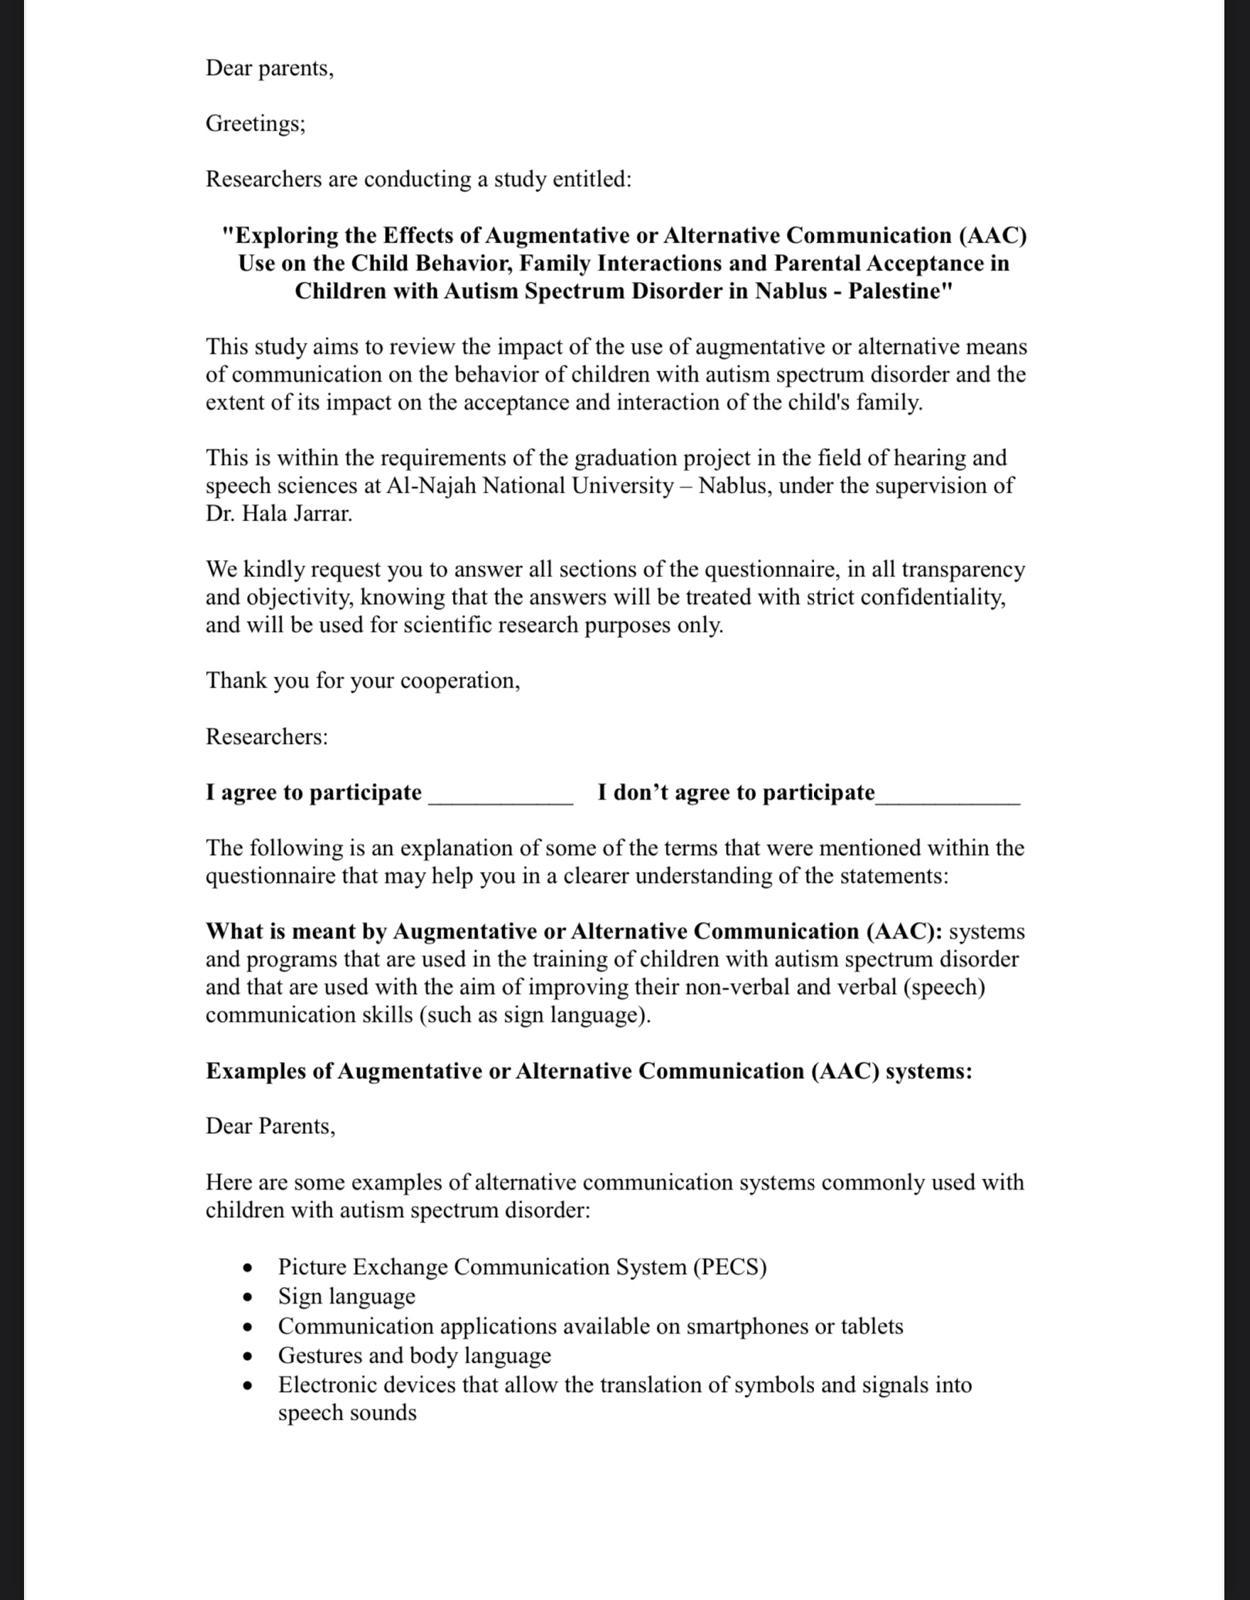


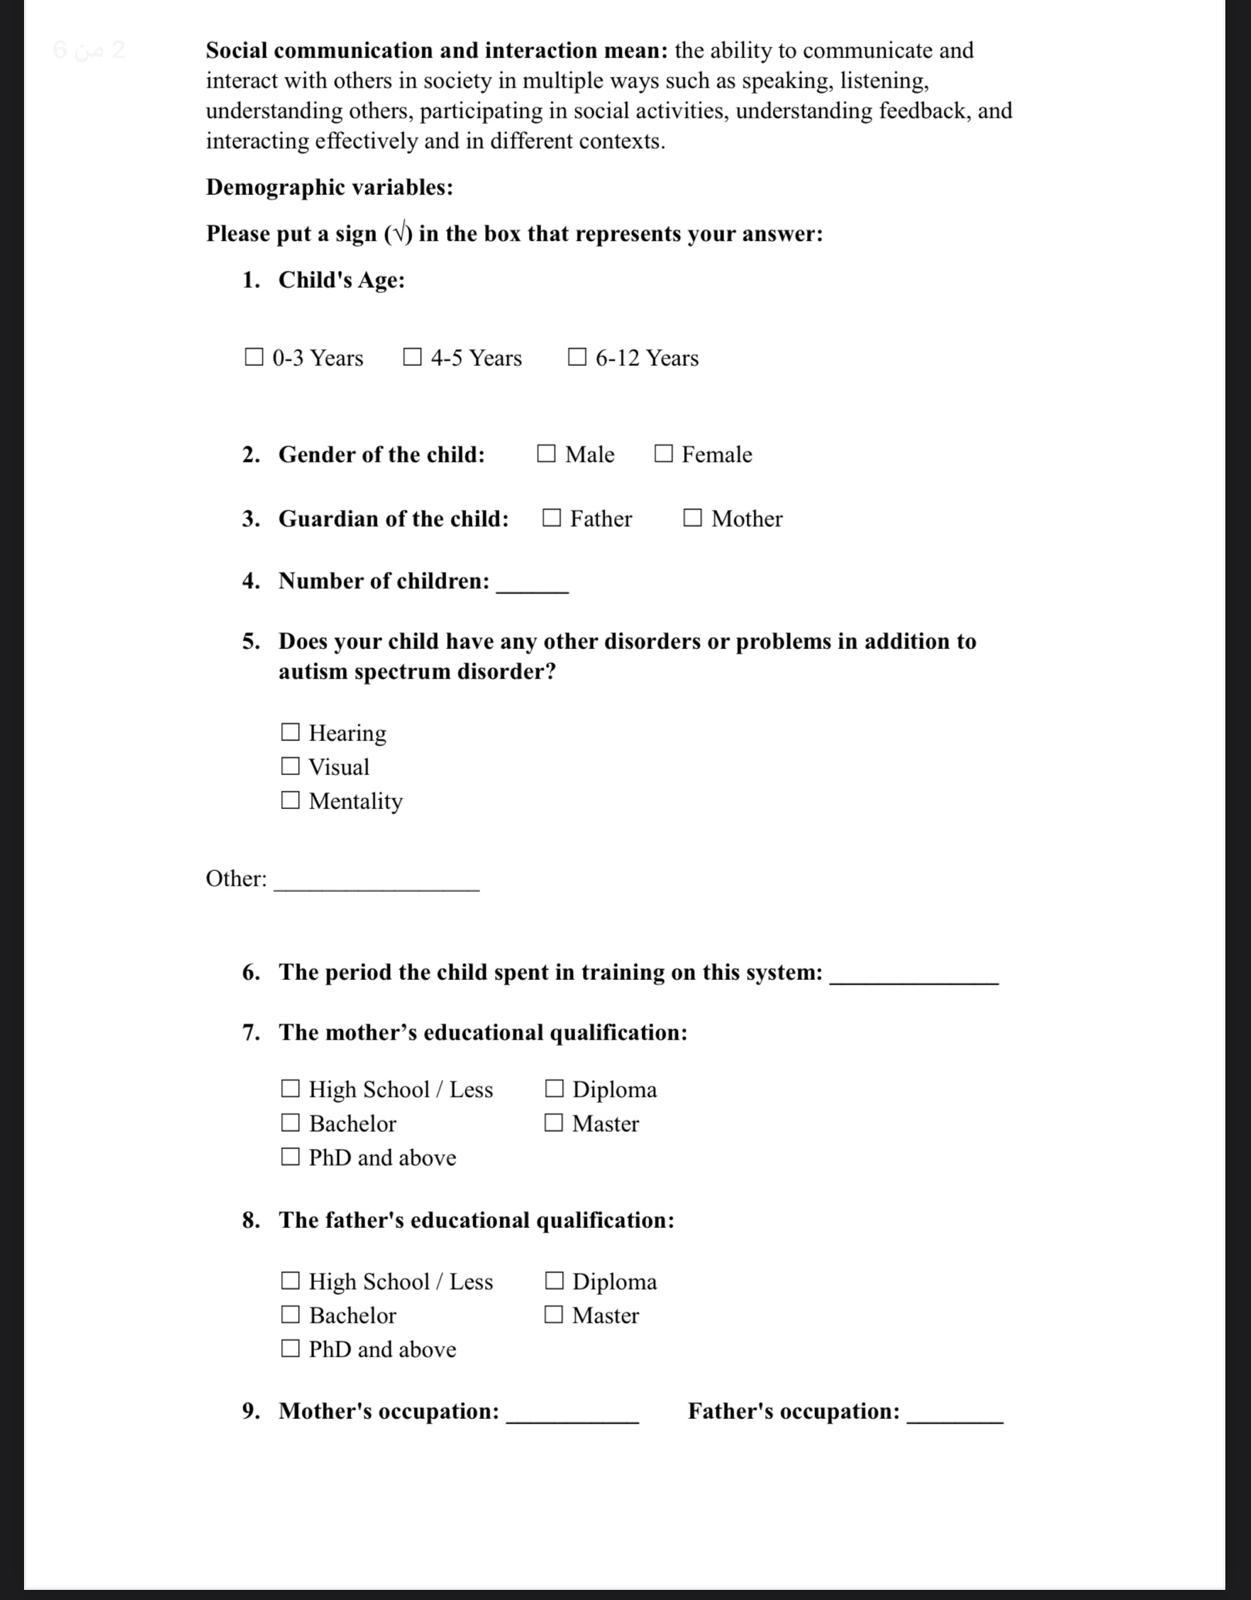

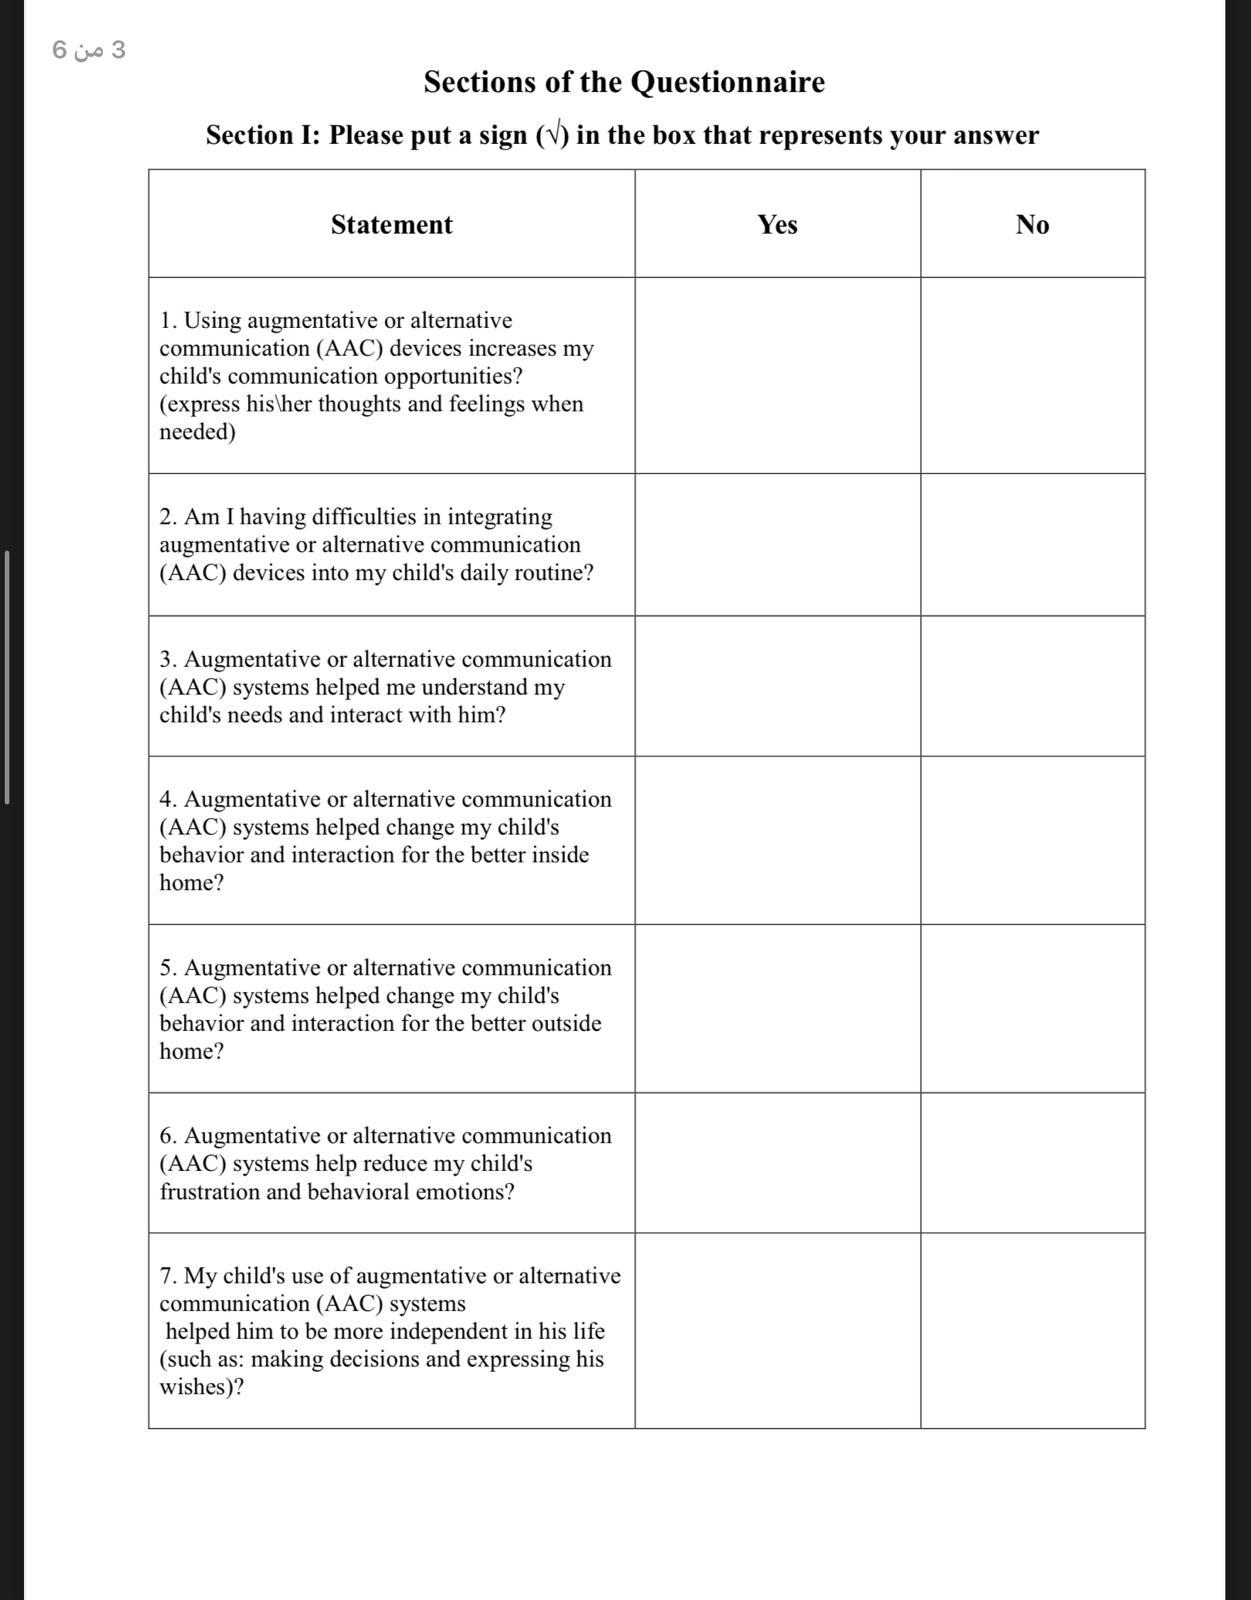

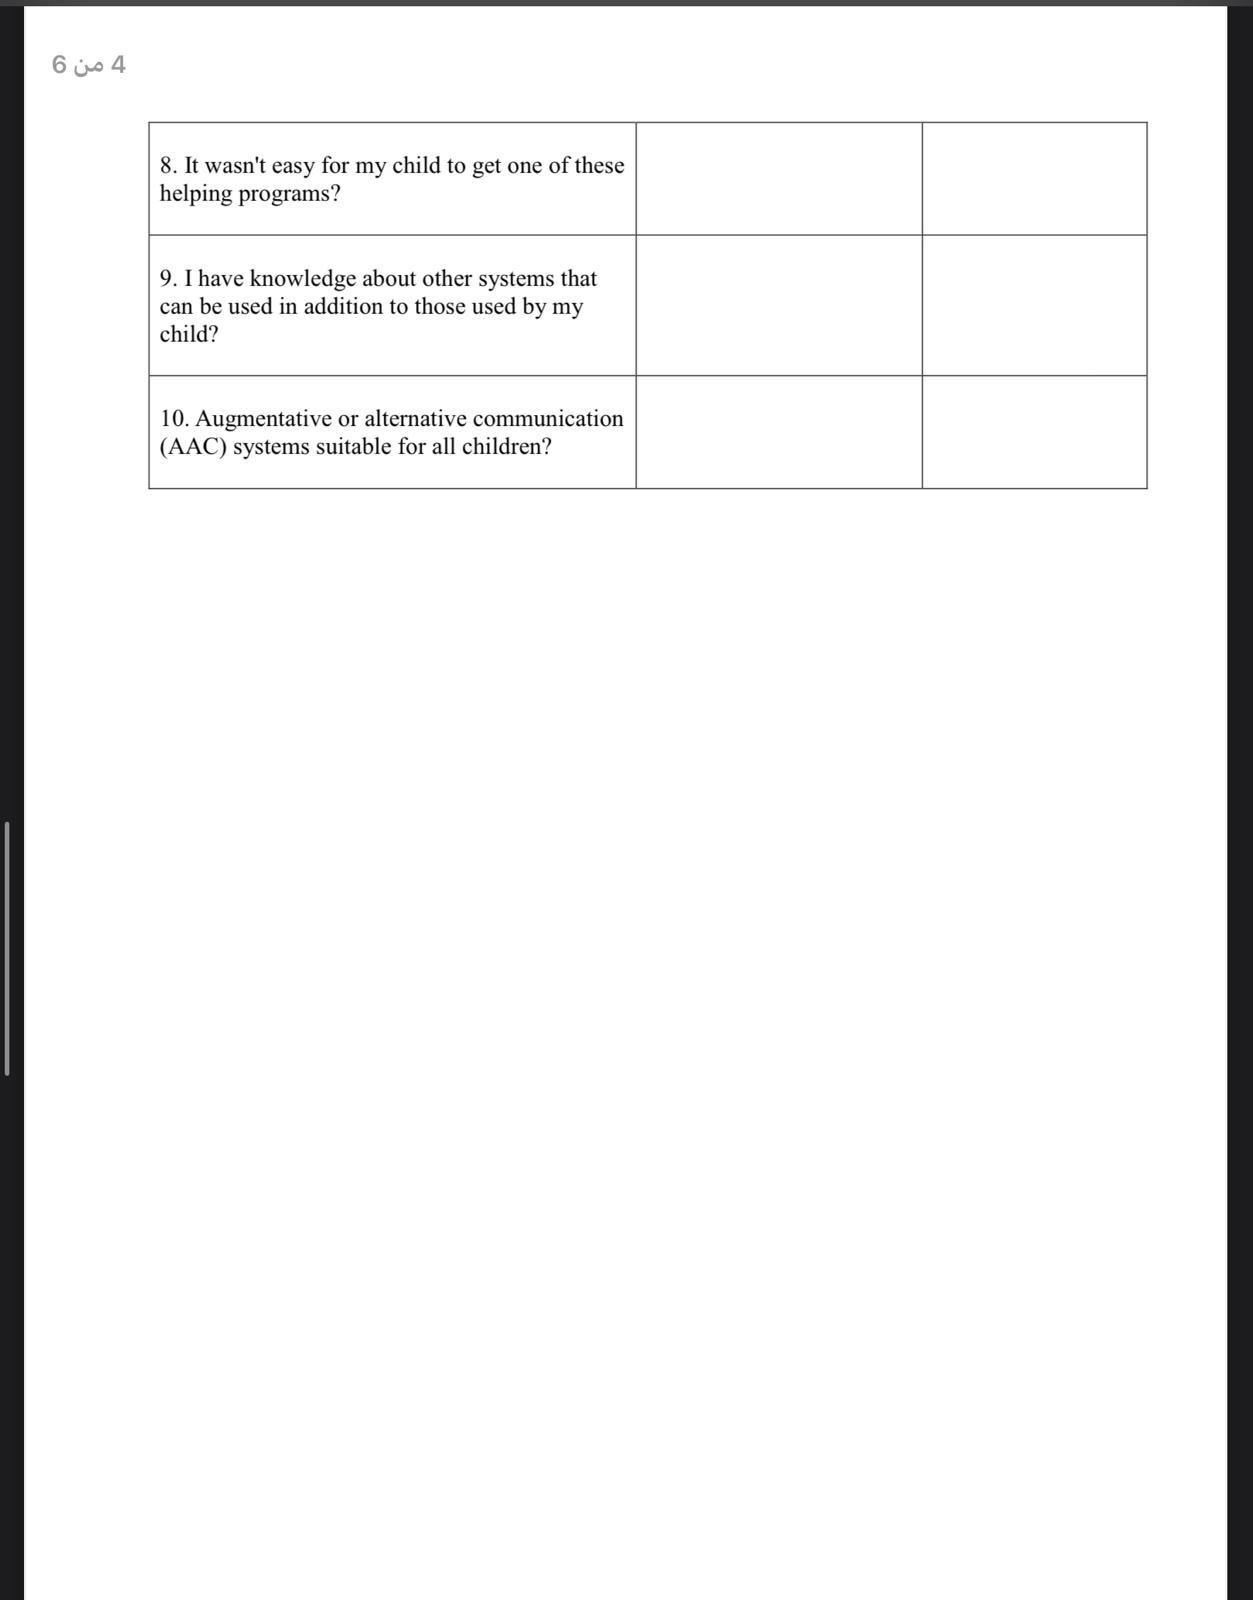

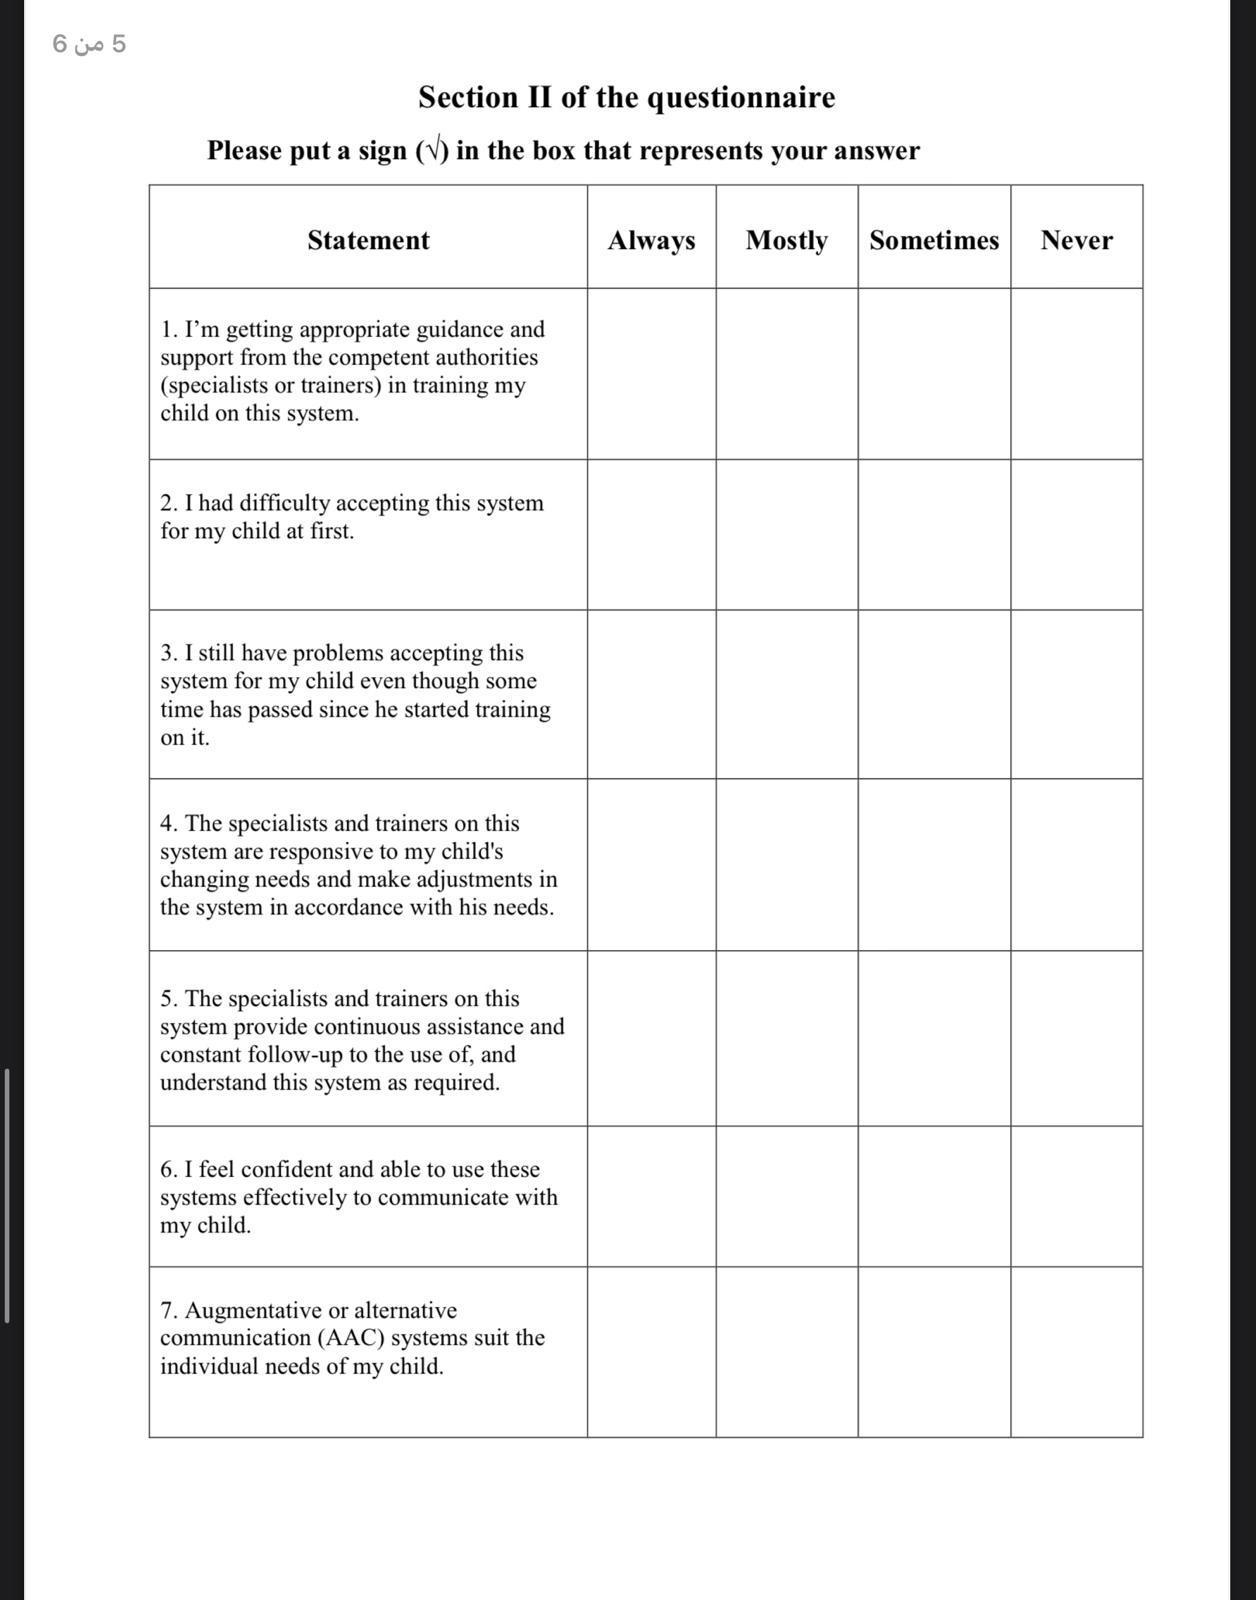

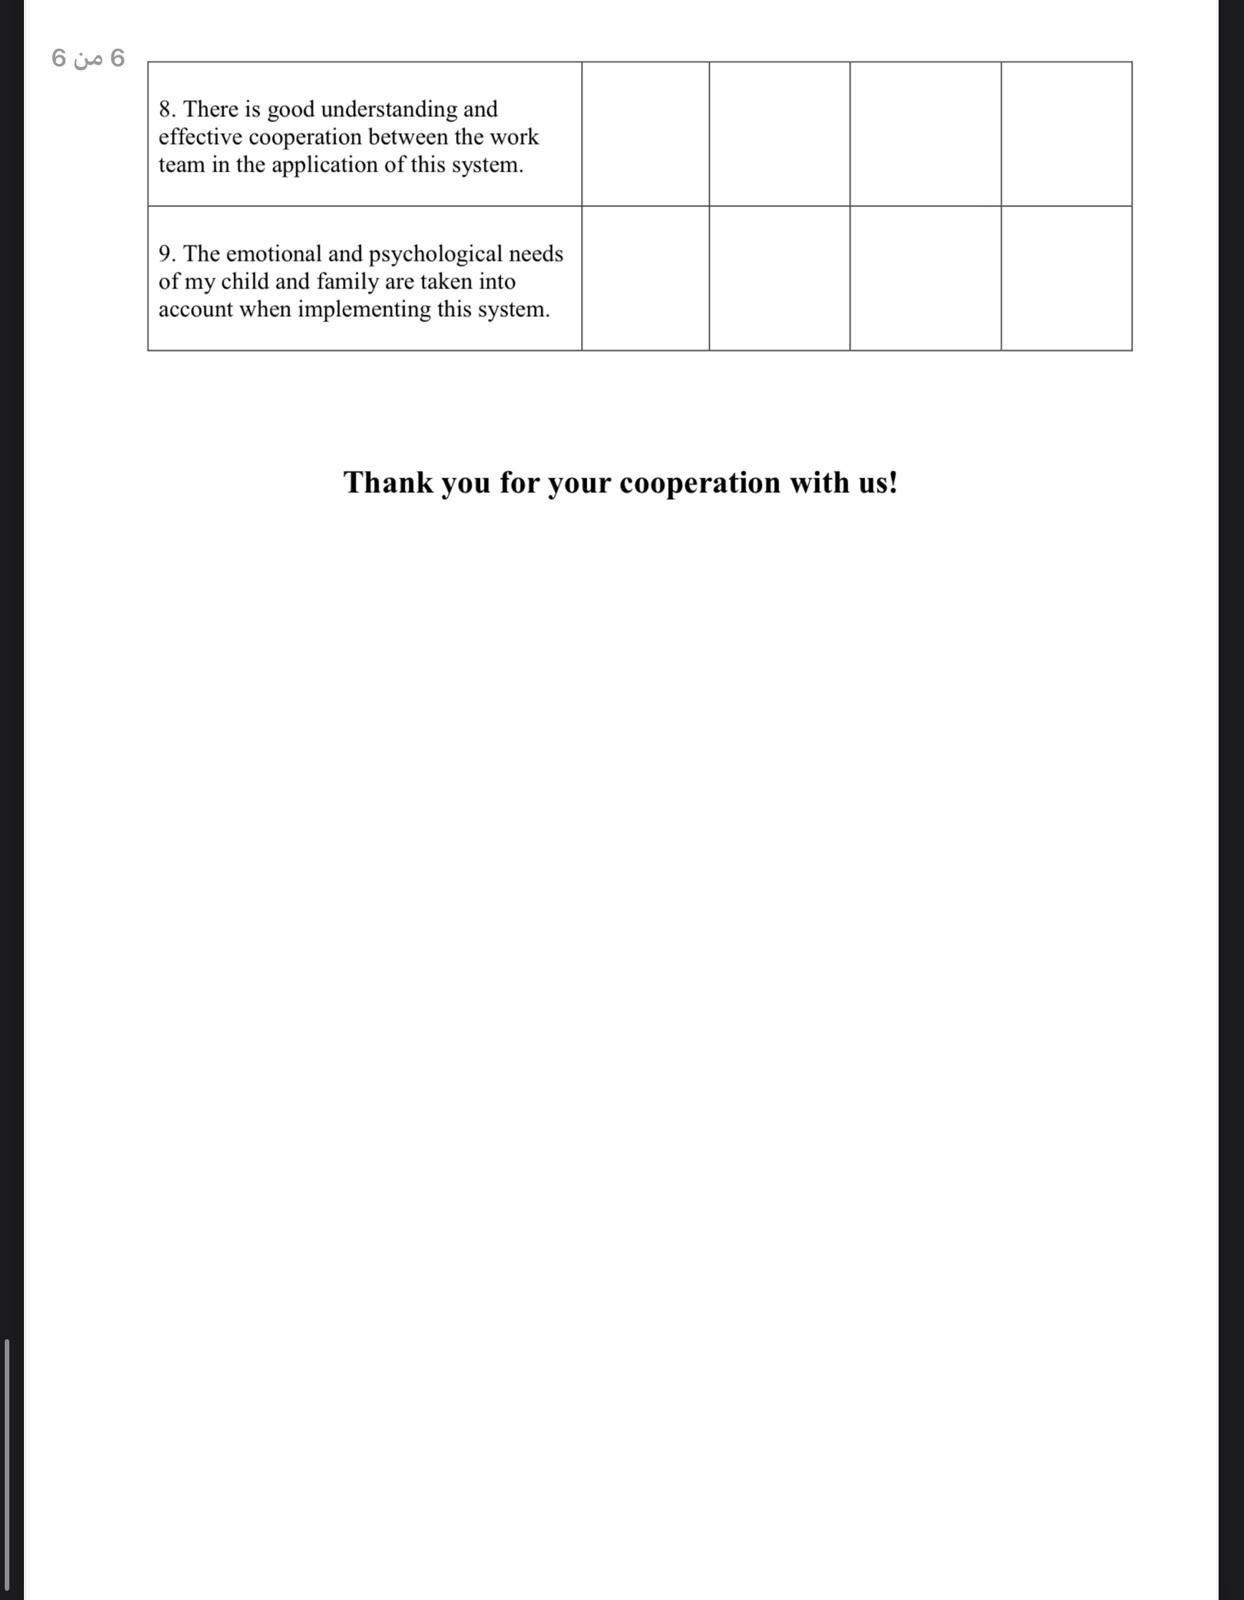

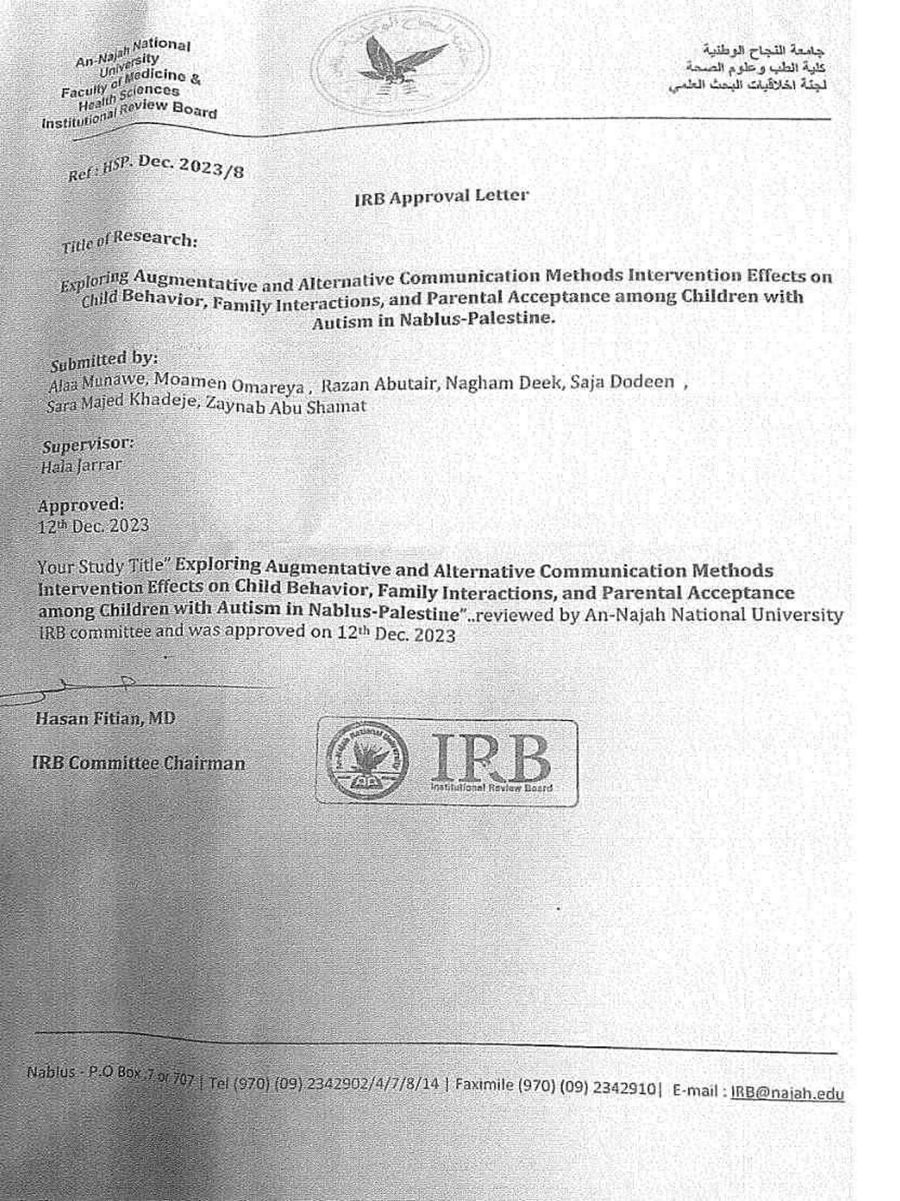

Supplement: Supplementary file 1 [file cf422e3c165cafbf7080a93e.docx]
